# Supplementary material
Source: Royal Society of Chemistry journal article supplement (doi:10.1039/d5ta10528e)
Supplement: d5ta10528e1.pdf [file d5ta10528e1.pdf]

## Supplementary information

### **Gellan gum-based ionic conductive hydrogel with self-healing capability, piezoionicity and ionic thermoelectricity as flexible sensors**

*Zhitao Hu<sup>a</sup>, Susu Ma<sup>b#</sup>, Yang Yang<sup>a</sup>, Ruopeng Li<sup>a</sup>, Kewei Du<sup>d</sup>, Jie Wei<sup>a,\*</sup>, Yunfei Niu<sup>b,d\*</sup>, Jun Zhao<sup>c,e\*</sup>*

<sup>a</sup>Key Laboratory for Ultrafine Materials of Ministry of Education, East China University of Science and Technology, Shanghai, 200237, China

<sup>b</sup>Department of Trauma Orthopaedics, the first affiliated hospital of Naval Medical University, Shanghai 200433, China

<sup>c</sup>Shanghai Jiao Tong Univ, Shanghai Peoples Hosp 9, Coll Stomatol, Natl Clin Res Ctr Oral Dis, Sch Med, Dept Orthodont, Shanghai 200011, China

<sup>d</sup>Department of Orthopaedics, Shidong Hospital affiliated to University of Shanghai for Science and Technology, Shanghai 200438, China

<sup>e</sup>Shanghai Res Inst Stomatol, Shanghai 200011, China

\*. Corresponding author

Jie Wei, E-mail: [jiewei7860@sina.com](mailto:jiewei7860@sina.com);

Yunfei Niu, [nyunfei1219@163.com](mailto:nyunfei1219@163.com);

Jun Zhao, [yuzj\\_260@hotmail.com](mailto:yuzj_260@hotmail.com).

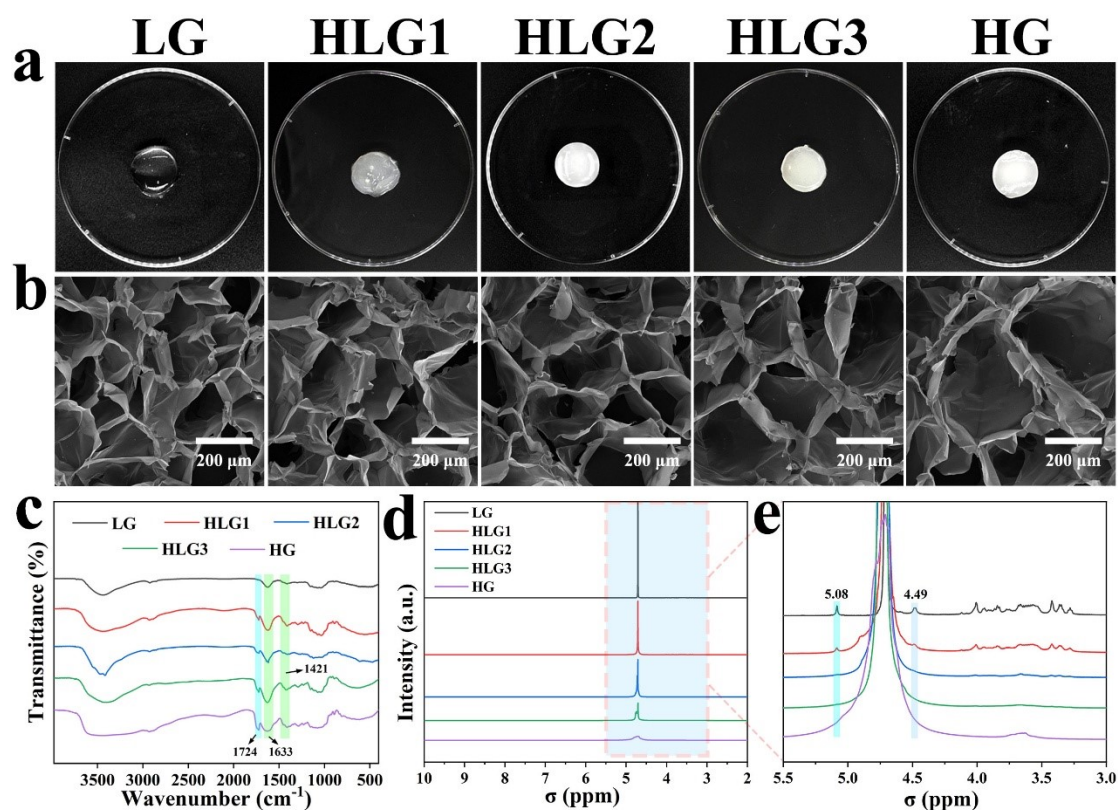

**Fig. S1.** Digital photos (a), SEM images (b), FTIR spectrum (c),  $^1\text{H-NMR}$  spectrum (d) and enlarged spectrum (e).

Fig. S1a shows the digital photos of different samples of HGL. LG is colorless and transparent, while HG is white and translucent. As the HG ratio increases, transparency of HGL decreases. SEM images (Fig. S1b) reveal a 3-D network structure with uniformly distributed pores of all samples, and the pore size increases of HGL with HG content increasing. FTIR (Fig. S1c) shows that all samples exhibit the characteristic peaks at 3442, 1633, 1421, and 1100  $\text{cm}^{-1}$ , and peak intensity of C=O group at 1724  $\text{cm}^{-1}$  increases with the increase of HG content.

The  $^1\text{H-NMR}$  spectra (Fig. S1d, e) shows that the peak intensity of sugar ring proton at 4.71 ppm decreases and broadens, indicating steric hindrance from HG. Fig. S2a presents that the swelling ratio of HGL increases with HG ratio increasing due to high hydrophilicity of HG. Fig. S2b shows that the water-holding capacity of the samples increases with the HG content increasing. Fig. S2c shows rheological curves, where  $G'$  is greater than  $G''$  for all samples, but both decrease with HG content increasing. Fig.

S2d, e, f show that the tensile strength and modulus decrease, while elongation at break increases with HG content increasing. Fig. S2f shows that the toughness of the samples initially increases, then decreases, and HLG2 exhibits the highest toughness ( $7.6 \text{ kJ/m}^3$ ), indicating the optimal flexibility.

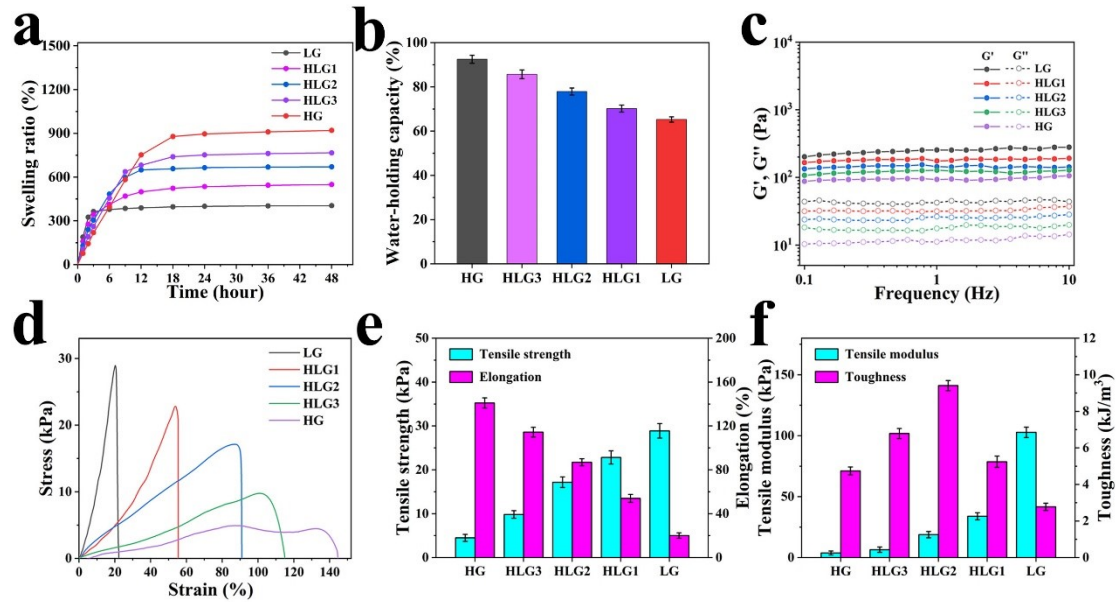

**Fig.S2.** Swelling ratio (a) and water-holding capacity (b) of different samples; Frequency-sweep rheological curves of  $G'$  and  $G''$  (c); Tensile stress-strain curves (d), Tensile strength and elongation (e) and Tensile modulus and toughness (f).

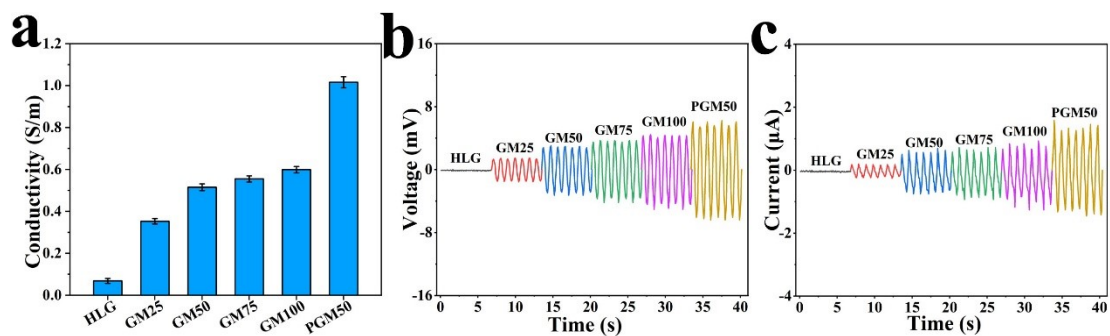

**Fig. S3.** Conductivity (a), Open-circuit voltage (b) and Short-circuit current (c) of different samples.

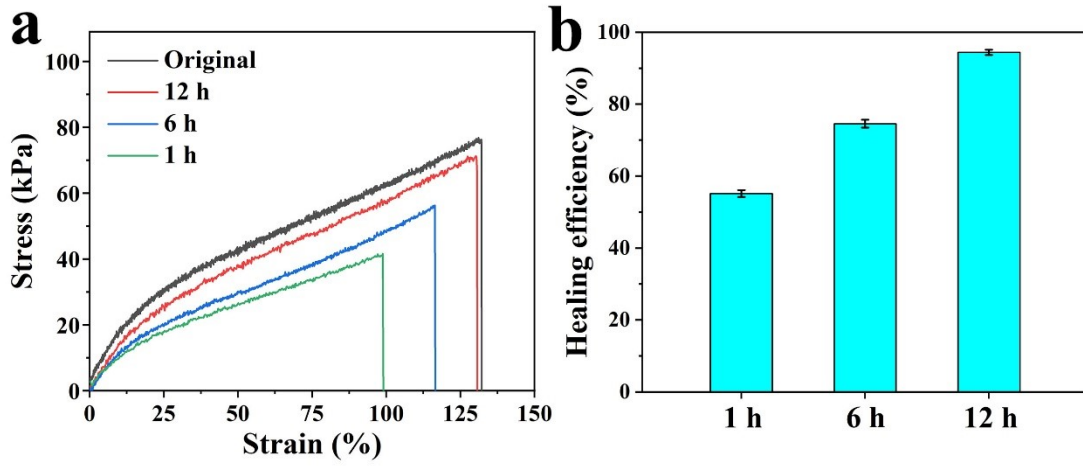

**Fig.S4** Tensile stress-strain curves (a) and self-healing efficiency (b) of PGM50 with the different healing time.

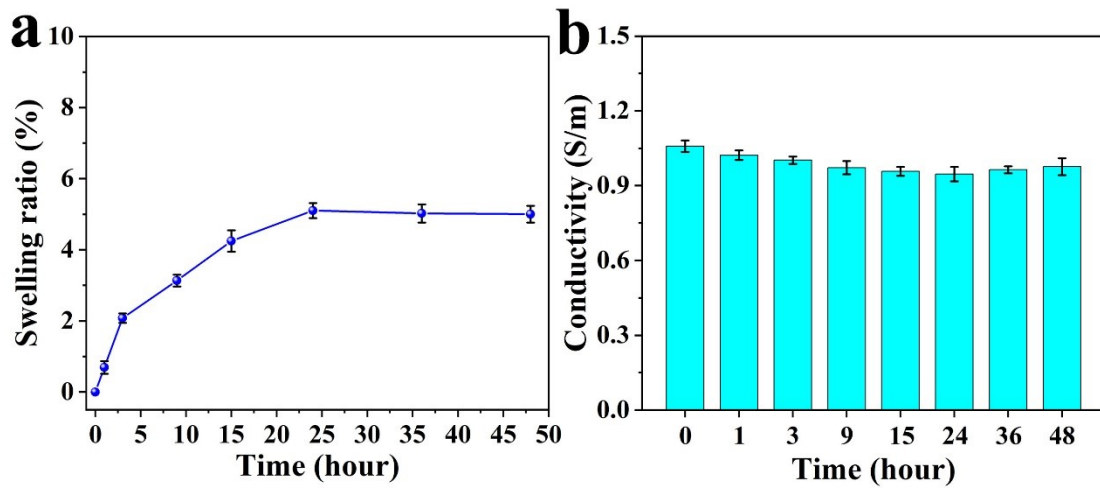

**Fig.S5** Swelling ratio (a) and conductivity (b) of PGM50 after immersion in water for different time.

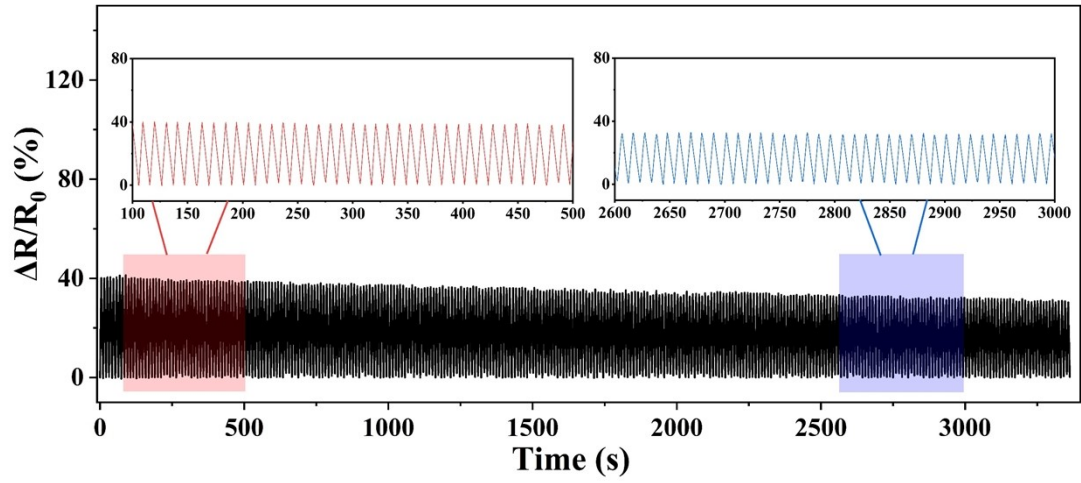

Fig.S6 Stability of the PGM50 piezoresistive sensor.

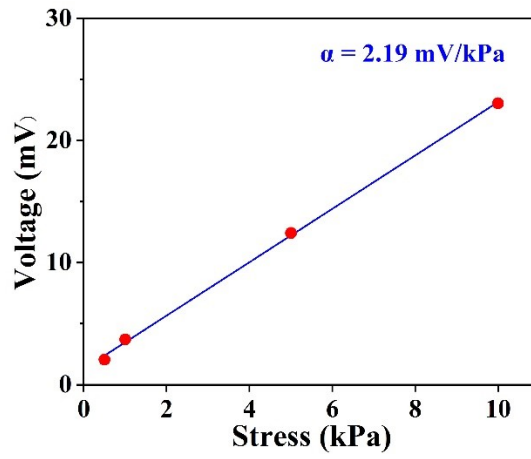

Fig.S7 Piezoionic coefficient of the PGM50 piezoionic sensor.

Table S1 Tensile strength and elongation of PGM50 and recent ionic hydrogels

| Material                                                                                                 | Tensile strength<br>/Elongation | Reference |
|----------------------------------------------------------------------------------------------------------|---------------------------------|-----------|
| Phytic acid /Gellan gum /MnCl <sub>2</sub> ionic hydrogel<br>(PGM50)                                     | 68.7 kPa /132.6%                | This work |
| Cellulose/NaOH ionic hydrogels (CIHs)                                                                    | 49 kPa /120.9%                  | S1        |
| Poly (sulfobetaine methacrylate)/ Calcium<br>alginate ionic hydrogel (BIH)                               | 12.3 kPa /175%                  | S2        |
| Gelatin/Tannic acid/Dialdehyde-β-<br>cyclodextrin/Borax hydrogel (GT <sub>5</sub> -DACD <sub>2</sub> -B) | 41 kPa /142.6%                  | S3        |
| Oxidized alginate /Gelatin/Borax/CaCl <sub>2</sub><br>hydrogel (CaAG-30m)                                | 23.6 kPa /204%                  | S4        |

Table S2 Compressive strength and compressibility of PGM50 and recent ionic hydrogels

| Material                                                                                                                                          | Compressive strength<br>/Compressibility | Reference |
|---------------------------------------------------------------------------------------------------------------------------------------------------|------------------------------------------|-----------|
| Phytic acid /Gellan gum /MnCl <sub>2</sub> ionic hydrogel<br>(PGM50)                                                                              | 429.3 kPa /64.7%                         | This work |
| Methacrylate-Kappa-carrageenan /Dopamine<br>functionalized graphene oxide/KCl hydrogel<br>(KaMA-GOPD)                                             | 167.3 kPa /60%                           | S5        |
| Silk sericin-g-Glycidyl methacrylate /Phenyl<br>(2,4,6-trimethylbenzoyl) lithium phosphate<br>ionic hydrogel (SS-g-GMA30%)                        | 70.03 kPa /67.09%                        | S6        |
| Borax-functionalized oxidized chondroitin<br>sulphate /Polypyrrole /Gelatin hydrogel<br>(BOCPG)                                                   | 239 kPa /76.5%                           | S7        |
| Poly dopamine methacrylamide-<br>methacrylatoethyl trimethyl ammonium<br>chloride-acrylic acid /cellulose nanofiber ionic<br>hydrogels (PDDA/CNF) | 260.9 kPa /76%                           | S8        |

Table S3 The  $G'$  and  $n_e$  values for HLG, GM50 and PGM50

| <b>Material</b> | <b><math>G'</math>(Pa)</b> | <b><math>n_e</math> (mol/m<sup>3</sup>)</b> |
|-----------------|----------------------------|---------------------------------------------|
| HLG             | 141                        | 0.06                                        |
| GM50            | 3068                       | 1.24                                        |
| PGM50           | 9785                       | 3.95                                        |

Table S4 GF of PGM50 and recent hydrogel flexible sensors

| <b>Material</b>                                                                                                                             | <b>GF</b> | <b>Reference</b> |
|---------------------------------------------------------------------------------------------------------------------------------------------|-----------|------------------|
| Phytic acid /Gellan gum /MnCl <sub>2</sub> ionic hydrogel (PGM50)                                                                           | 1.752     | This work        |
| Agar /Borax /MXene /NaOH conductive hydrogel<br>(Agar/Borax/MXene CH)                                                                       | 1.520     | S9               |
| Poly 1-methyl-3-(4-vinylbenzyl)imidazolium chloride-r-sodium 2-acrylamino-2-methylpropanesulfonate ionic conductive hydrogel (PMVIC-r-SAMS) | 1.140     | S10              |
| P(AM-co-SBMA) /Waterborne polyurethane /Zn <sup>2+</sup><br>(PASU-Zn)                                                                       | 0.060     | S11              |
| PVA /Xanthan Gum /Borax hydrogel (PVA /XTG /Borax)                                                                                          | 0.56      | S12              |
| Cellulose /Al <sub>2</sub> (SO <sub>4</sub> ) <sub>3</sub> /LiOH /Urea /AgNW hydrogel (X-cel-OH)                                            | 0.71      | S13              |

Table S5 Piezoionic coefficient of PGM50 and recent piezoionic hydrogels

| <b>Material</b>                                                               | <b>Piezoionic coefficient<br/>(mV/kPa)</b> | <b>Reference</b> |
|-------------------------------------------------------------------------------|--------------------------------------------|------------------|
| Phytic acid /Gellan gum /MnCl <sub>2</sub> ionic hydrogel<br>(PGM50)          | 2.19                                       | This work        |
| Poly(acrylic acid)/Lithium chloride hydrogels<br>(PAA/LiCl)                   | 0.043                                      | S14              |
| SnSe-Hydrogel Composites                                                      | 1.78                                       | S15              |
| Poly(acrylamide-co-poly(ethylene glycol)<br>diacrylate)/NaCl (P(AM-co-PEGDA)) | 0.013                                      | S16              |

## References

- S1. R. Tong, G. Chen, D. Pan, H. Qi, R. a. Li, J. Tian, F. Lu and M. He, *Biomacromolecules*, 2019, **20**, 2096-2104.
- S2. B. Chen, R. Yu, J. Wang, Y. Feng, Y. Zhang, Y. Mao, C. Shan and X. Wang, *Advanced Functional Materials*, 2025, **n/a**, e27495.
- S3. M. Li, S. Wang, Y. Li, X. Meng, Y. Wei, Y. Wang, Y. Chen, Y. Xiao and Y. Cheng, *ACS Applied Materials & Interfaces*, 2024, **16**, 51618-51629.
- S4. X. Zhang, K. Wang, J. Hu, Y. Zhang, Y. Dai and F. Xia, *Journal of Materials Chemistry A*, 2020, **8**, 25390-25401.
- S5. H. Mokhtari, M. Kharaziha, F. Karimzadeh and S. Tavakoli, *Carbohydrate Polymers*, 2019, **214**, 234-249.
- S6. T. Zha, W. Zhou, J. Chen, Y. Liu, Y. Liu, X. Wang, X. Li, B. Li, Q. Han and S. Du, *Polymer*, 2026, **342**, 129362.
- S7. Y. Luo, L. Fan, C. Liu, H. Wen, S. Wang, P. Guan, D. Chen, C. Ning, L. Zhou and G. Tan, *Bioactive Materials*, 2022, **7**, 98-111.
- S8. J. Wei, X. Zhang, F. Wang, Y. Shao, W.-B. Zhang and H. Wu, *Compos. Sci. Technol.*, 2023, **231**, 109793.
- S9. Z. Nie, K. Peng, L. Lin, J. Yang, Z. Cheng, Q. Gan, Y. Chen and C. Feng, *Chemical Engineering Journal*, 2023, **454**, 139843.
- S10. B. Zhang, X. Zhang, H. Song, D. H. Nguyen, C. Zhang and T. Liu, *ACS Applied Materials & Interfaces*, 2022, **14**, 32551-32560.
- S11. H. Wang, X. Li, Y. Ji, J. Xu, Z. Ye, S. Wang and X. Du, *Journal of Materials Chemistry B*, 2022, **10**, 2933-2943.
- S12. Y. Xu and X. Maimaitiyiming, *International Journal of Biological Macromolecules*, 2024, **282**, 136972.
- S13. X. Feng, C. Xing, C. Wang, Y. Tian, S. Shang, H. Liu, X. Huang, J. Jiang, Z. Song and H. Zhang, *International Journal of Biological Macromolecules*, 2024, **267**, 131536.
- S14. J. Dai, Y. Xue, X. Chen, Z. Cao, L. Wang, J. Zhang, Y. Zhou, Y. Hu, W. Zhou, W. Tang, X.-Y. Kong, B. Tu, J. Liu and K. Xiao, *Device*, 2024, **2**, 100436.
- S15. F. Li, X. Cai, G. Liu, H. Xu and W. Chen, *Advanced Functional Materials*, 2023, **33**, 2300701.
- S16. B. Ma, K. Huang, G. Chen, Y. Tian, N. Jiang, C. Zhao and H. Liu, *Soft Science*, 2024, **4**, 8.
